# Supplementary material
Source: publisher figshare collection journal article supplement (https://acs.figshare.com/ndownloader/files/18033536)
Supplement: Supplementary file 1 [file 18033536]

Compound_ID	SMILES	IC50 (nM)	MM-GBSA dG bind (kcal/mol)	XP gScore	Ki
Allo-1	O=C1N(C2=CC=C(Cl)C=C2)C([C@H](C)N1CC3=CC=CC=C3)=O	59¡À9	-88.45	-11.405	33¡À14
1	O=C1N(C2=CC=C(N=[N+]=[N-])C=C2)C([C@H](C)N1CC3=CC=CC=C3)=O	58¡À6			55¡À21
2	O=C1N(C2=CC=C(Cl)C=C2)C([C@H](C)N1CC3=CC=C(N=[N+]=[N-])C=C3)=O	3¡À2			45¡À11
3	O=C1N(C2=CC=C(OCC#C)C=C2)C([C@H](C)N1CC3=CC=C(N=[N+]=[N-])C=C3)=O	31¡À8			28¡À14
4	O=C(N(CC1=CC=C(C2(N=N2)C(F)(F)F)C=C1)[C@H]3C)N(C4=CC=C(Cl)C=C4)C3=O	872¡À582			197¡À38
5	O=C1N(C2=CC=C(Cl)C=C2)C([C@H](C)N1CC3CCCCC3)=O	383¡À109	-76.77	-10.945
6	O=C1N(C2=CC=C(Cl)C=C2)C([C@H](C)N1CC3=C(F)C(F)=C(F)C(F)=C3F)=O	7382¡À2618	-79.88	-11.371
7	O=C1N(C2=CC=C(Cl)C=C2)C([C@H](C)N1C3=CC=CC=C3)=O	547¡À453	-80.3	-10.635
8	O=C1N(C2=CC=C(Cl)C=C2)C([C@H](C)N1CCC3=CC=CC=C3)=O	92¡À38	-85.26	-11.737
9	O=C1N(C2CCCCC2)C([C@H](C)N1CC3=CC=CC=C3)=O	8006¡À1994	-69.95	-10.557
10	O=C1N(C2=C(F)C(F)=C(F)C(F)=C2F)C([C@H](C)N1CC3=CC=CC=C3)=O	1533¡À262	-73. 49	-11.213
11	O=C1N(CC2=CC=C(Cl)C=C2)C([C@H](C)N1CC3=CC=CC=C3)=O	8097¡À1921	-82.12	-10.581
12	S=C1N(C2=CC=C(Cl)C=C2)C([C@H](C)N1CC3=CC=CC=C3)=O	3791¡À673	-75.18	-11.014
13	O=C1N(C2=CC=C(Cl)C=C2)C[C@H](C)N1CC3=CC=CC=C3	4552¡À2245	-85.19	-11.246
